# Supplementary material for: Antifouling, fouling release and antimicrobial materials for surface modification of reverse osmosis and nanofiltration membranes
Source: Royal Society of Chemistry journal article supplement (doi:10.1039/c7ta08627j), 2017-11-29
Supplement: c7ta08627j1.pdf [file c7ta08627j1.pdf]

## Antifouling, Fouling Release and Antimicrobial Materials for Surface Modification of Reverse Osmosis and Nanofiltration Membranes

Rikarani R. Choudhury<sup>a</sup>, Jaydevsinh M. Gohil<sup>a,\*</sup>, Smita Mohanty<sup>a</sup>, Sanjay K. Nayak<sup>a,b</sup>

<sup>a</sup> Laboratory for Advanced Research in Polymeric Materials (LARPM), Central Institute of Plastics Engineering & Technology (CIPET), Bhubaneswar-751024, Odisha, India

<sup>b</sup> Advanced Polymer Design & Development Research Laboratory (APDDRL), Central Institute of Plastics Engineering & Technology (CIPET), Bengaluru, Karnataka, India

<sup>c</sup> Central Institute of Plastics Engineering & Technology (CIPET), Chennai, India.

### Supporting Information

#### S1: Worldwide desalination capacities along with source water<sup>1</sup>

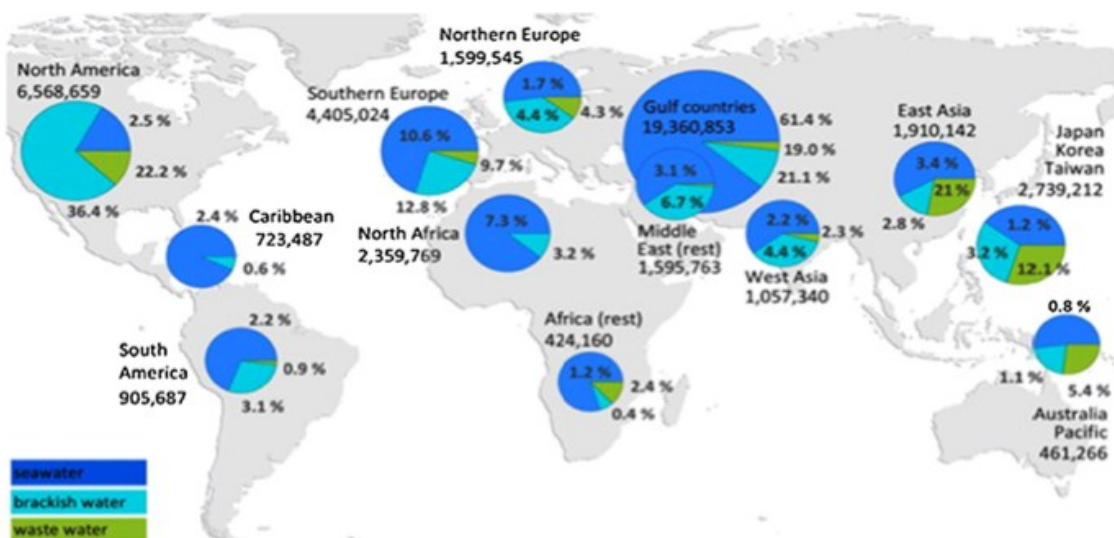

#### S2: Global installed desalination capacity during (a) 2010-2016<sup>2</sup> and (b) 1980-2012<sup>3</sup>

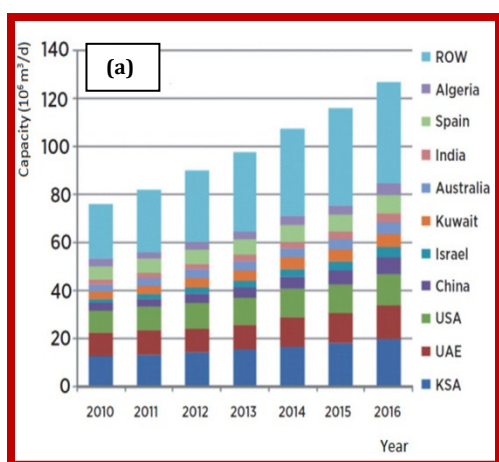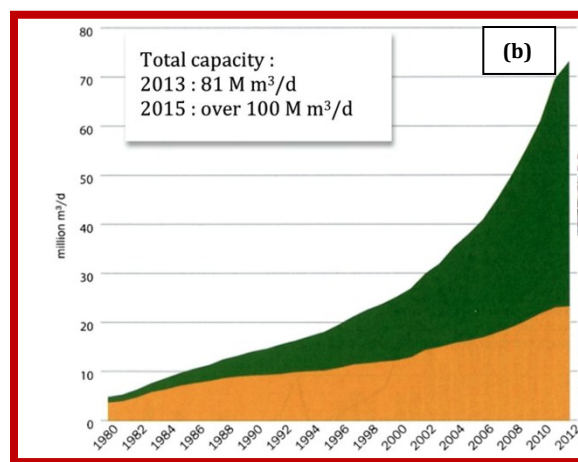

**S3:** Various approaches adopted for the minimization of RO/NF membrane fouling<sup>4,5</sup>

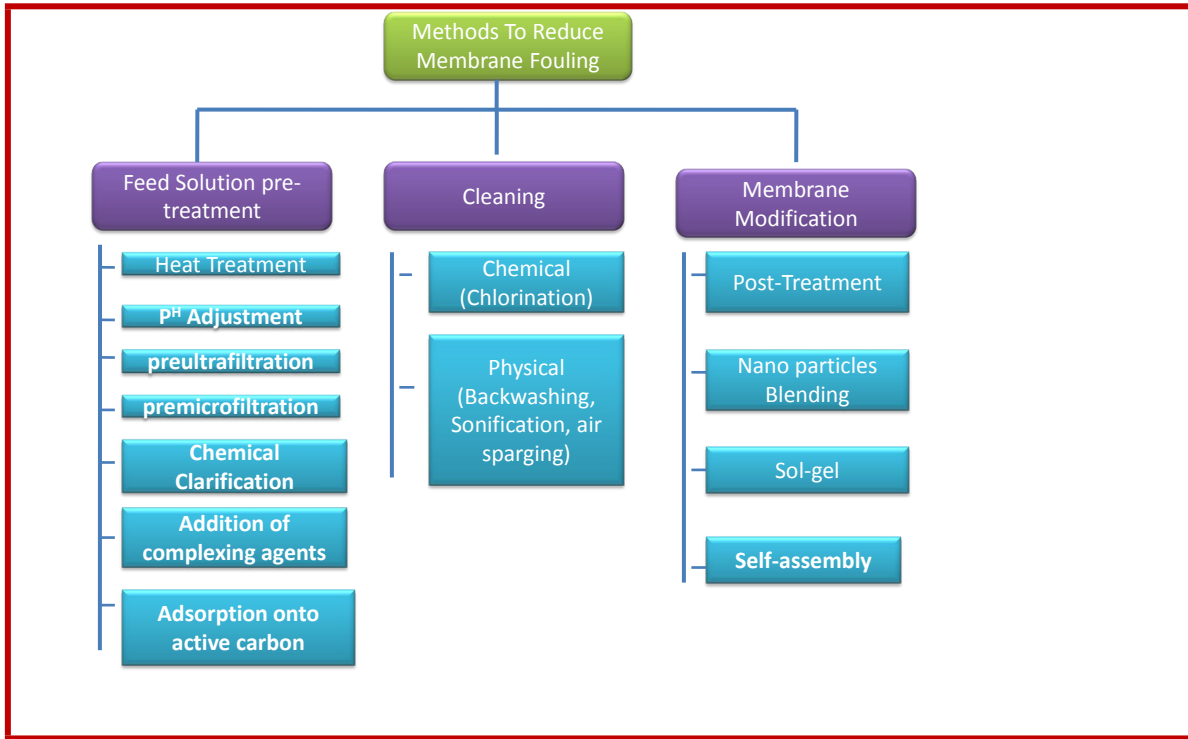

**S4 :** Number of papers published in the last 7-8 years in the domain of (a) membrane surface modification, key words: TFC membrane surface modification + RO or nanofiltration [Source: Scopus), and (b) Pre-formed membrane surface modification, Keywords: Surface Modification+TFC membrane [Source: Elsevier +ACS]

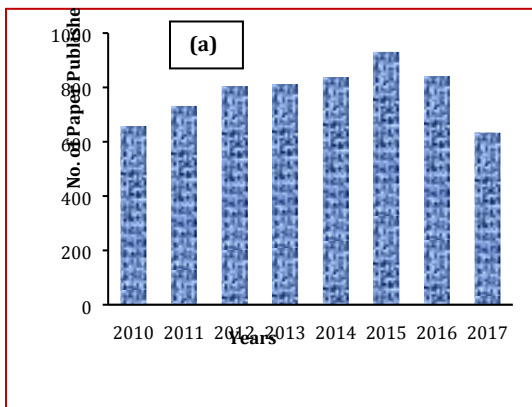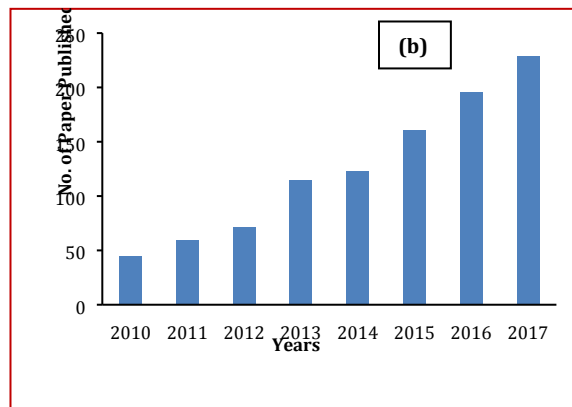

S5: Represents the typical surface modification techniques reported so far in the literature

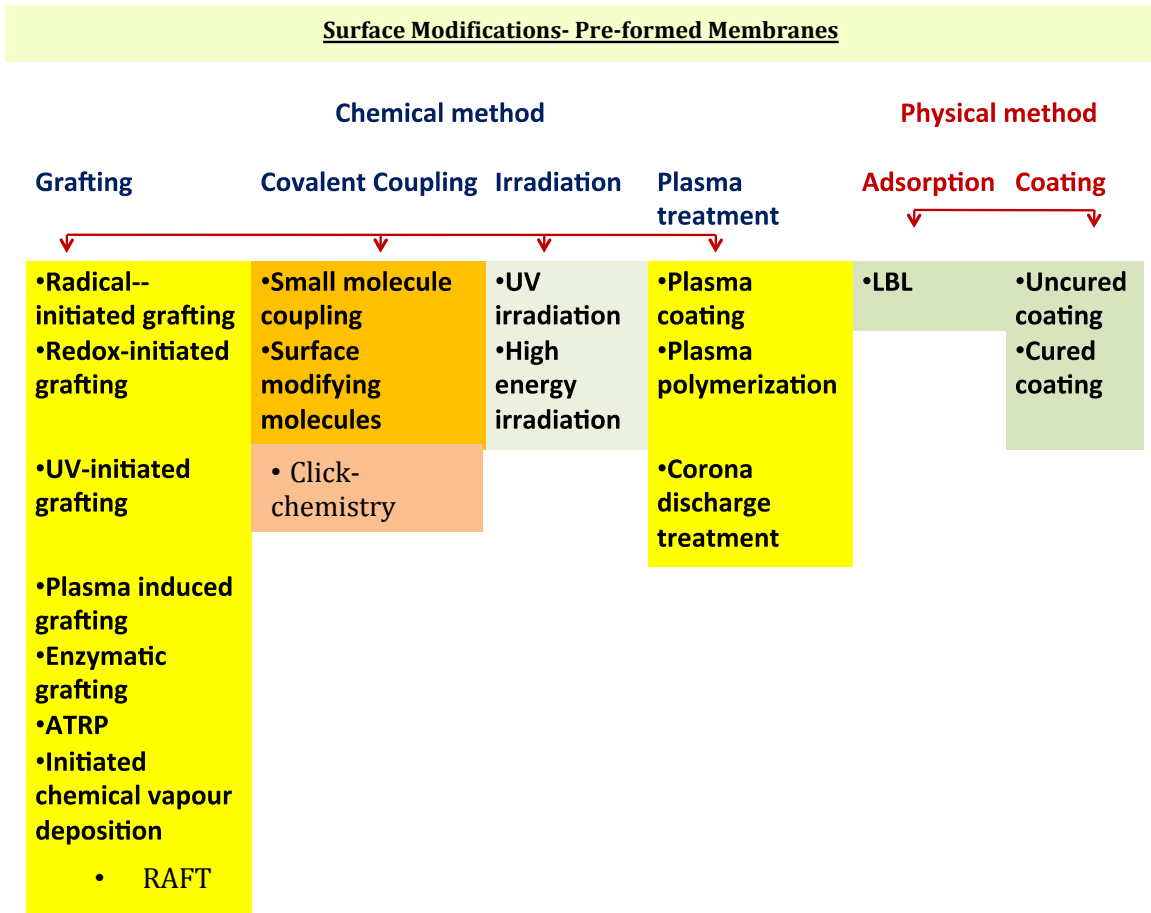

Commercial membrane modification scenario

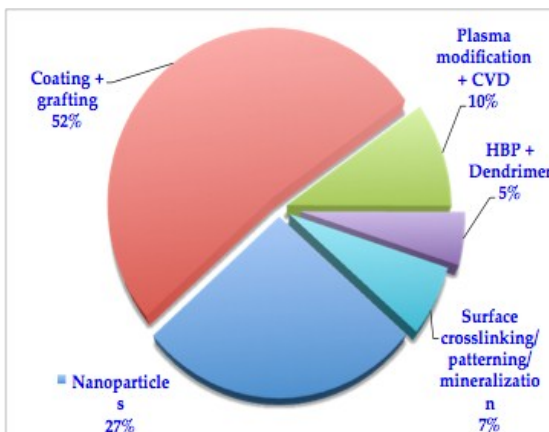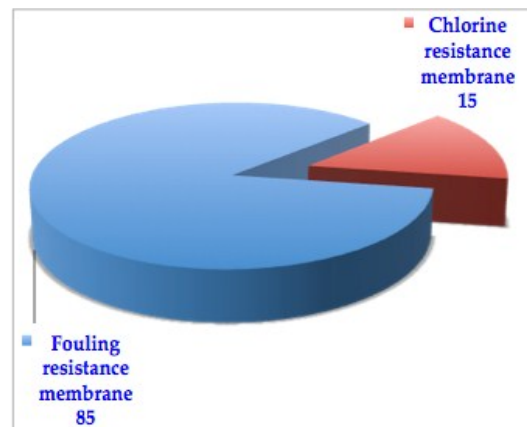

**S6** : The intrinsic interrelationship among membrane fouling, concentration polarization (CP) and reverse solute diffusion (RSD) in ODMP<sup>6</sup>

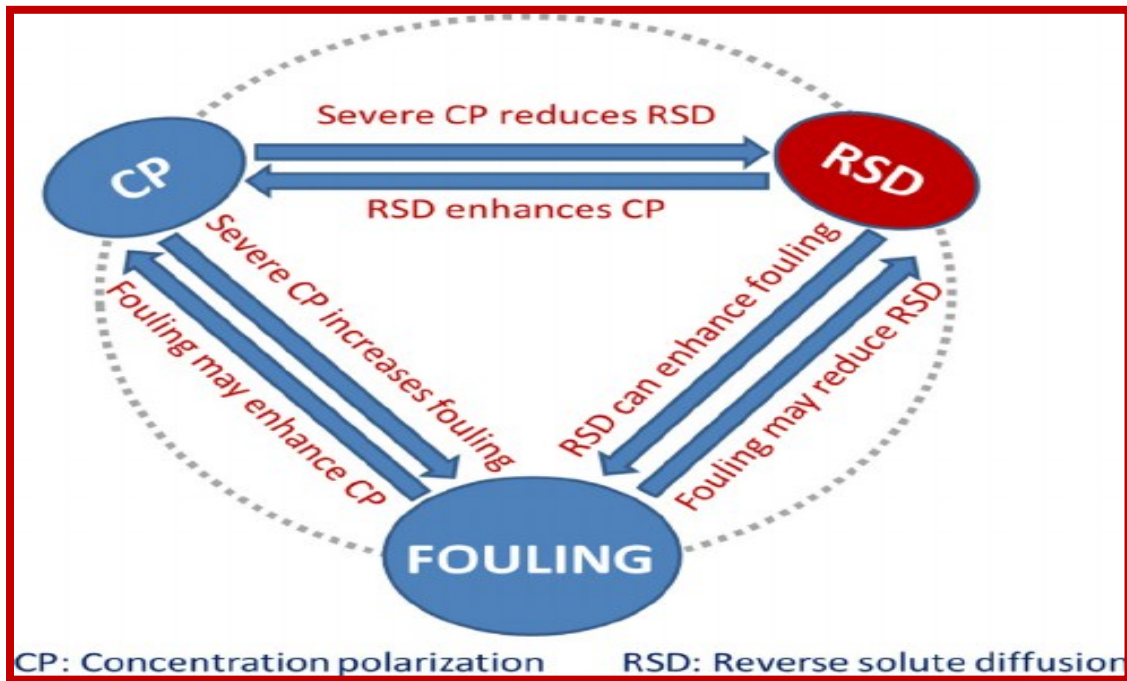

#### References

1. J. Saqib and I.H. Aljundi, *Journal of Water Process Engineering*, 2016, 11, 68-87
2. K. Zotalis, E. G. Dialynas, N. Mamassis and A. N. Angelakis, *Water*, 2014, 6, 1134-11150
3. J. Saqib and I. H. Aljundi, *Journal of Water Process Engineering*, 2016, 11, 68-87
4. J. H. Jhaveri and Z. V. P. Murthy, *Desalination*, 2016, 379, 137-154
5. <http://slideplayer.com/slide/4427966/>
6. Q. She, R. Wang, A. G.Fane, C. Y.Tang, *Journal of Membrane Science*, 2016, 499, 201-233
